# Supplementary material for: Rapid Detection of Anti-SARS-CoV-2 Antibody Using a Selenium Nanoparticle-Based Lateral Flow Immunoassay
Source: PubMed Central journal article supplement (PMC8905607; doi:10.1109/tnb.2021.3105662), 2021-08-18
Supplement: supp1-3105662.pdf [file supp1-3105662.pdf]

## Supplemental materials

### Rapid detection of anti-SARS-CoV-2 IgM and IgG using a selenium nanoparticle-based lateral flow immunoassay

Chunxia Chen<sup>†</sup>, Hangzhan Hu<sup>†</sup>, Xiaoquan Li<sup>†</sup>, Zhizeng Wang<sup>\*</sup>, Zhi Zheng, Xuance Wang, Peiming Zheng, Facai Cui, Gang Li, Yaohui Wang, Zhigang Liu<sup>\*</sup> and Yuanfang Ma<sup>\*</sup>.

Chunxia Chen, Hangzhan Hu, Zhizeng Wang, Zhi Zheng, Xuance Wang, Yaohui Wang, and Yuanfang Ma are with Joint National Laboratory for Antibody Drug Engineering, Clinical Laboratory of the First Affiliated Hospital, School of Medicine, Henan University; School of Basic Medical of Sciences, Henan University, Kaifeng, 475004, China(email: ccxchem@163.com, hzz3356@163.com, wzhzeng@126.com, zhengzhi0119@126.com, wangxuance@126.com, wangyaohui2001@sina.com, and mayf@henu.edu.cn).

Xiaoquan Li and Zhigang Liu are with Joint National Laboratory for Antibody Drug Engineering, Clinical Laboratory of the First Affiliated Hospital, Henan University Kaifeng, 475004, China(email: 706534930@qq.com and 13592144067@126.com).

Peiming Zheng, Facai Cui, Gang Li are with Department of Clinical Laboratory of Henan Provincial People' Hospital of Henan University, Zhengzhou, 450003, China(zpm8266@163.com, cuifacai1@163.com and ligang65587359@163.com).

\*Correspondence author: Zhizeng Wang, Zhigang Liu and Yuanfang Ma.

<sup>†</sup> These authors contributed equally.

## Contents

---

| <b>Number</b> | <b>Name</b>                                                                   | <b>Page</b> |
|---------------|-------------------------------------------------------------------------------|-------------|
| 1             | Selection of conjugating and coating conditions for anti-SARS-CoV-2 detection | 3           |
| 2             | High concentration of anti-nucleoprotein IgM detection by the IgM kit         | 4           |
| 3             | Basic information of clinical samples for figure 7 and Table 1                | 5-21        |
| 4             | Detection result for serum after the second vaccine injection by this kit     | 22          |

---

# 1 Selection of conjugating and coating conditions for anti-SARS-CoV-2 detection for figure 4

Different concentration of anti-human IgG and anti-human IgM is coated on the test line as G line and M line, respectively. Different concentrations of nucleoprotein conjugated with selenium nanoparticle to prepare conjugate pads. The effect (Figure 1) is verified by two negative serums. Figure S1a is coating condition selection of IgG detection for Figure 4a in manuscript; figure S1b is coating condition selection of IgM detection for Figure 4b in manuscript; figure 1c is conjugating condition selection of IgG detection for Figure 4c in manuscript; figure S1dis conjugating condition selection of IgG detection for Figure 4d in manuscript.

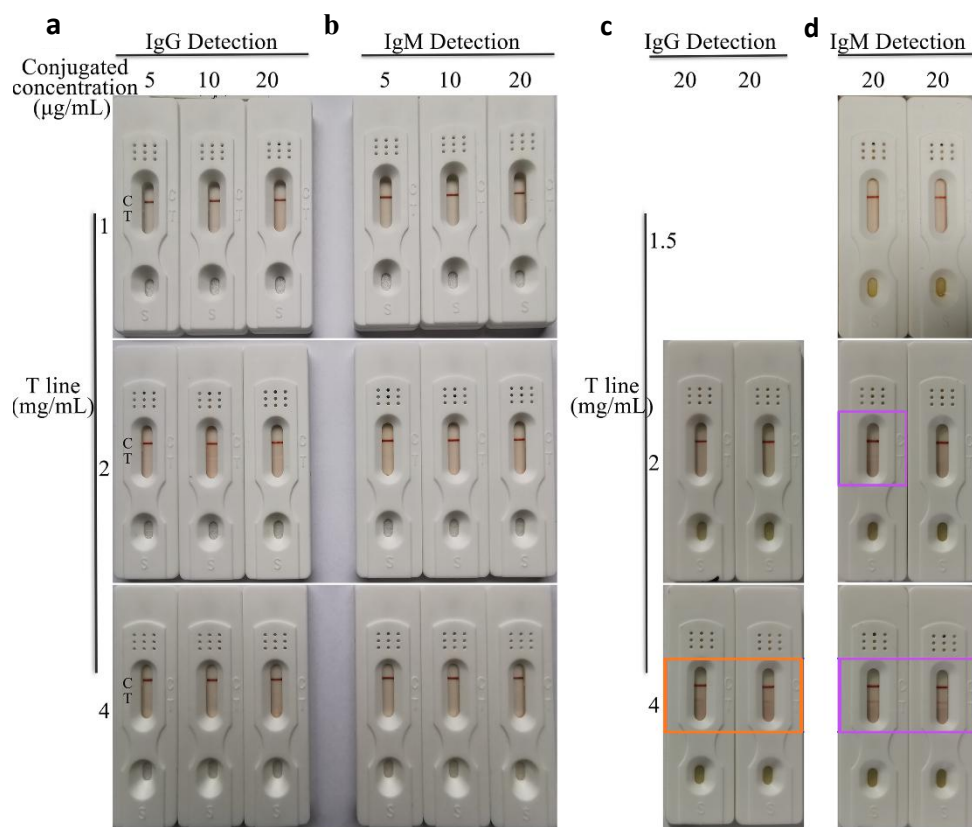

Figure S1 Selection of conjugating and coating conditions for anti-SARS-CoV-2 detection. SARS-CoV-2, severe acute respiratory syndrome coronavirus 2. Orange box: IgG false positive detection result; Purple box: IgM false positive detection result. C: Control line; T: Test line.

**2 High concentration of anti-nucleoprotein IgM detection by the IgM kit** High concentration (1000, 500, 200, 100, 50, 0 ng/mL) of anti-nucleoprotein of SARS-CoV-2 IgM was detected, and the result was shown in figure S2, the limit of detection (LOD) was 100 ng/mL by naked eye (figure S2a) and GraphPad Prism 8 (figure S2b); we added a set of detection (100, 90, 80, 70, 60, 50, 0 ng/mL of anti-nucleoprotein of SARS-CoV-2 IgM) as the 50 ng/mL to 100 ng/mL span is large; and the result was shown in Figure 5c, 5d in our manuscript, the final LOD is determined to be 60 ng/mL according to Figure 5c, 5d.

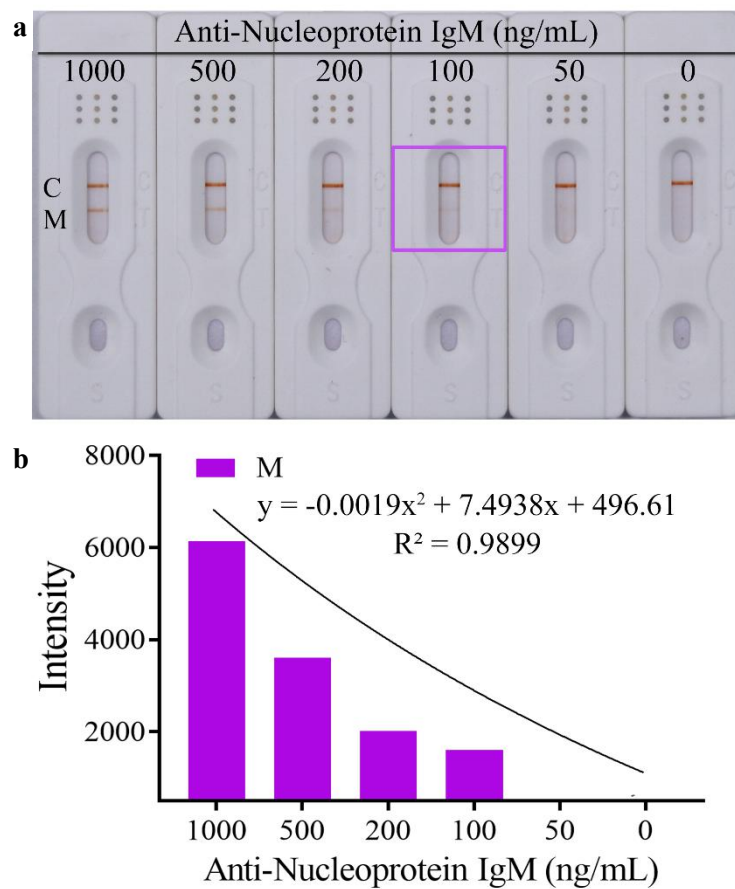

Figure S2 High concentration of anti-nucleoprotein IgM detection by the IgM kit. Result of detection for IgM (a) by naked eyes; Analysis result of detection for (b) by GraphPad Prism 8. C: Control line; M: Test line for IgM detection.

### **3 Basic information of clinical samples for figure 7 and Table 1**

A total 72 clinical samples were detected: 19 positive sample of COVID-19 and 53 negative samples, and the negative samples contained 12 normal persons (Sample number 42-53) who had no cold symptoms within 2 weeks. The basic information of clinical samples are shown in table S1 - table S6, and the results are shown in figure S3 - figure S8.

The age and sex information of the positive samples are shown in table S1.

Table S1 Basic information of positive sample

| Number | Sex    | Age | COVID-19 or not<br>( + / - ) | Judgment method | Notes          |
|--------|--------|-----|------------------------------|-----------------|----------------|
| 1      | Female | 70  | +                            | RT-PCR          |                |
| 2      | Female | 87  | +                            | RT-PCR          |                |
| 3      | Male   | 58  | +                            | RT-PCR          |                |
| 4      | Female | 61  | +                            | RT-PCR          |                |
| 5      | Male   | 90  | +                            | RT-PCR          |                |
| 6      | Female | 48  | +                            | RT-PCR          |                |
| 7      | Male   | 43  | +                            | RT-PCR          |                |
| 8      | Female | 26  | +                            | RT-PCR          |                |
| 9      | Female | 88  | +                            | RT-PCR          |                |
|        |        |     |                              |                 |                |
| 11     | Male   | 77  | +                            | RT-PCR          |                |
| 12     | Male   | 57  | +                            | RT-PCR          |                |
| 13     | Female | 79  | +                            | RT-PCR          |                |
| 14     | Female | 78  | +                            | RT-PCR          |                |
| 15     | Male   | 57  | +                            | RT-PCR          |                |
| 16     | Female | 46  | +                            | RT-PCR          |                |
| 17     | Male   | 81  | +                            | RT-PCR          | False Negative |
| 18     | Female | 79  | +                            | RT-PCR          |                |
| 19     | Female | 65  | +                            | RT-PCR          |                |
| 20     | Male   | 57  | +                            | RT-PCR          |                |

The result of the positive samples for IgG detection are shown in figure S3, Naked eye results and auxiliary judgement are shown in figure S3a and figure S3b, respectively. The intensity of detection result for IgG are shown in table S2.

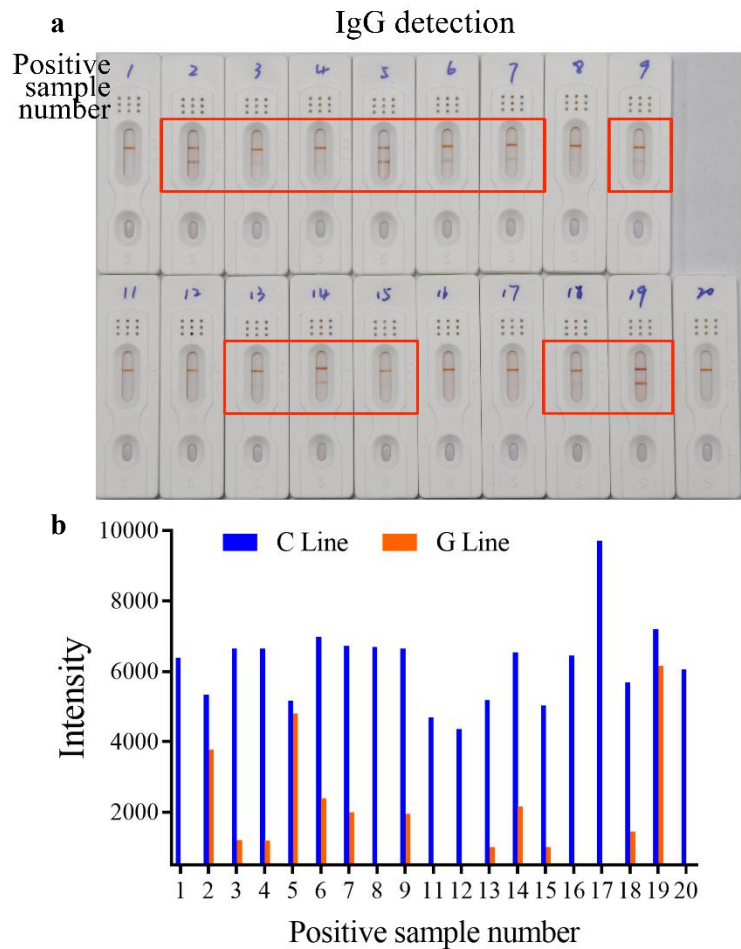

Figure S3 Positive sample detection results of anti-SARS-CoV-2 IgG (a) and auxiliary judgement (a). SARS-CoV-2, severe acute respiratory syndrome coronavirus 2, Cline: Control line; G line: Test line for IgG detection;

Table S2 Intensity results of positive samples for IgG detection

|               |    |     |    |    |     |    |    |    |     |    |
|---------------|----|-----|----|----|-----|----|----|----|-----|----|
| Sample number | 1  | 2   | 3  | 4  | 5   | 6  | 7  | 8  | 9   |    |
| Color degree  | —  | +++ | +  | +  | +++ | ++ | ++ | —  | +   |    |
| Sample number | 11 | 12  | 13 | 14 | 15  | 16 | 17 | 18 | 19  | 20 |
| Color degree  | —  | —   | +  | ++ | +   | —  | —  | +  | +++ | —  |



The result of the positive samples for IgM detection are shown in figure S4, Naked eye results and auxiliary judgement are shown in figure S4a and figure S4b, respectively. The intensity of detection result for IgM are shown in table S3.

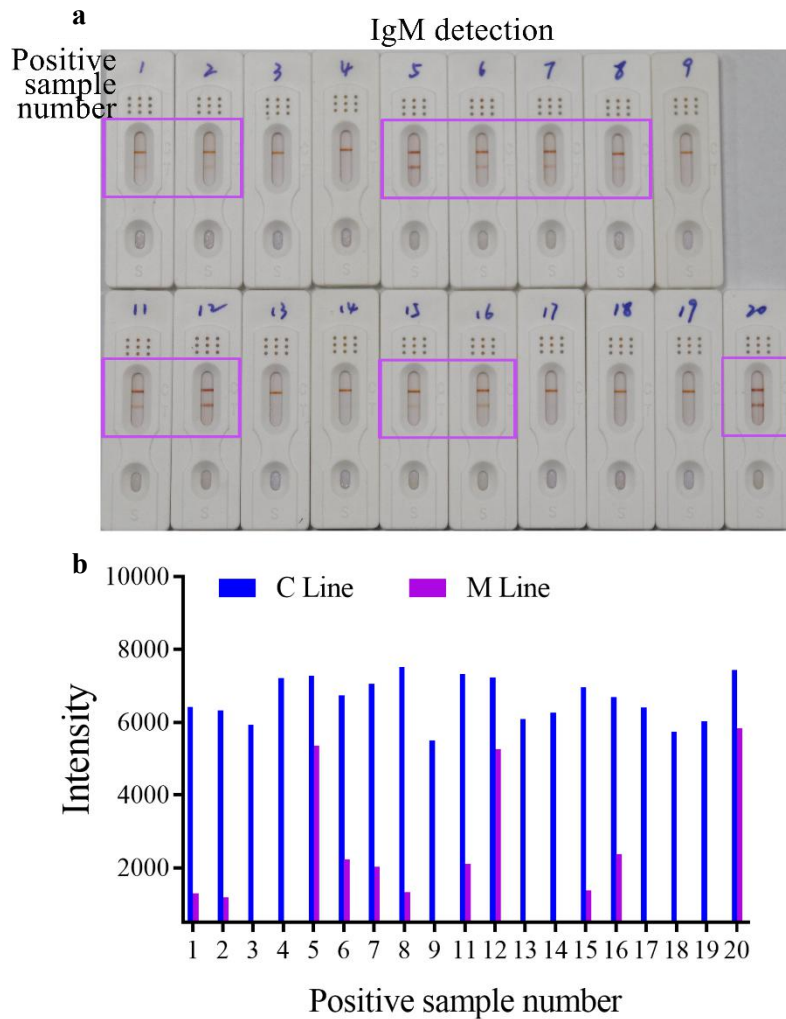

Figure S4 Positive sample detection results of anti-SARS-CoV-2 IgM (a) and auxiliary judgement (b). SARS-CoV-2, severe acute respiratory syndrome coronavirus 2, Cline: Control line; M line: Test line for IgM detection.

Table S3 Intensity results of positive samples for IgM detection

|               |    |     |    |    |     |    |    |    |    |     |
|---------------|----|-----|----|----|-----|----|----|----|----|-----|
| Sample number | 1  | 2   | 3  | 4  | 5   | 6  | 7  | 8  | 9  |     |
| Color degree  | +  | +   | —  | —  | +++ | ++ | ++ | +  | —  |     |
| Sample number | 11 | 12  | 13 | 14 | 15  | 16 | 17 | 18 | 19 | 20  |
| Color degree  | ++ | +++ | —  | —  | +   | ++ | —  | —  | —  | +++ |

The age and sex information of the negative samples are shown in table S4. Samples 42-53 are the serum of persons who have not had cold symptoms within two weeks.

Table S4 Negative sample information

| Number | Sex    | Age | COVID-19 or not ( + / - ) | Judgment method             | Notes              |
|--------|--------|-----|---------------------------|-----------------------------|--------------------|
| 1      | Female | 26  | —                         | Clinical symptoms by doctor |                    |
| 2      | Female | 38  | —                         | Clinical symptoms by doctor |                    |
| 3      | Female | 44  | —                         | Clinical symptoms by doctor |                    |
| 4      | Female | 44  | —                         | Clinical symptoms by doctor |                    |
| 5      | Female | 52  | —                         | Clinical symptoms by doctor |                    |
| 6      | Female | 53  | —                         | Clinical symptoms by doctor | IgM false positive |
| 7      | Female | 53  | —                         | Clinical symptoms by doctor |                    |
| 8      | Female | 84  | —                         | Clinical symptoms by doctor |                    |
| 9      | Female | 69  | —                         | Clinical symptoms by doctor |                    |
| 10     | Female | 69  | —                         | Clinical symptoms by doctor |                    |
| 11     | Male   | 1   | —                         | Clinical symptoms by doctor |                    |
| 12     | Male   | 31  | —                         | Clinical symptoms by doctor |                    |
| 13     | Male   | 42  | —                         | Clinical symptoms by doctor |                    |
| 14     | Male   | 49  | —                         | Clinical symptoms by doctor |                    |
| 15     | Male   | 53  | —                         | Clinical symptoms by doctor |                    |
| 16     | Male   | 53  | —                         | Clinical symptoms by doctor |                    |
| 17     | Male   | 53  | —                         | Clinical symptoms by doctor |                    |
| 18     | Male   | 51  | —                         | Clinical symptoms by doctor |                    |
| 19     | Male   | 54  | —                         | Clinical symptoms by doctor |                    |
| 20     | Male   | 55  | —                         | Clinical symptoms by doctor |                    |

| <b>Number</b> | <b>Sex</b> | <b>Age</b> | <b>COVID-19 or not ( + / - )</b> | <b>Judgment method</b>      | <b>Notes</b>       |
|---------------|------------|------------|----------------------------------|-----------------------------|--------------------|
| 21            | Male       | 56         | —                                | Clinical symptoms by doctor | IgG false positive |
| 22            | Female     | 31         | —                                | Clinical symptoms by doctor |                    |
| 23            | Female     | 40         | —                                | Clinical symptoms by doctor |                    |
| 24            | Female     | 43         | —                                | Clinical symptoms by doctor |                    |
| 25            | Female     | 48         | —                                | Clinical symptoms by doctor |                    |
| 26            | Female     | 59         | —                                | Clinical symptoms by doctor |                    |
| 27            | Female     | 60         | —                                | Clinical symptoms by doctor |                    |
| 28            | Female     | 16         | —                                | Clinical symptoms by doctor |                    |
| 29            | Male       | 16         | —                                | Clinical symptoms by doctor |                    |
| 30            | Male       | 18         | —                                | Clinical symptoms by doctor |                    |
| 31            | Male       | 31         | —                                | Clinical symptoms by doctor |                    |
| 32            | Male       | 32         | —                                | Clinical symptoms by doctor |                    |
| 33            | Male       | 46         | —                                | Clinical symptoms by doctor |                    |
| 34            | Male       | 46         | —                                | Clinical symptoms by doctor |                    |
| 35            | Male       | 49         | —                                | Clinical symptoms by doctor |                    |
| 37            | Male       | 50         | —                                | Clinical symptoms by doctor |                    |
| 38            | Male       | 52         | —                                | Clinical symptoms by doctor |                    |
| 39            | Male       | 60         | —                                | Clinical symptoms by doctor |                    |
| 40            | Male       | 57         | —                                | Clinical symptoms by doctor |                    |
| 41            | Male       | 57         | —                                | Clinical symptoms by doctor |                    |

| <b>Number</b> | <b>Sex</b> | <b>Age</b> | <b>COVID-19 or not ( + / - )</b> | <b>Judgment method</b>      | <b>Notes</b> |
|---------------|------------|------------|----------------------------------|-----------------------------|--------------|
| 42            | Male       | 25         | —                                | Clinical symptoms by doctor |              |
| 43            | Female     | 25         | —                                | Clinical symptoms by doctor |              |
| 44            | Male       | 26         | —                                | Clinical symptoms by doctor |              |
| 45            | Female     | 25         | —                                | Clinical symptoms by doctor |              |
| 46            | Female     | 26         | —                                | Clinical symptoms by doctor |              |
| 47            | Male       | 26         | —                                | Clinical symptoms by doctor |              |
| 48            | Male       | 23         | —                                | Clinical symptoms by doctor |              |
| 49            | Female     | 21         | —                                | Clinical symptoms by doctor |              |
| 50            | Male       | 25         | —                                | Clinical symptoms by doctor |              |
| 51            | Female     | 23         | —                                | Clinical symptoms by doctor |              |
| 52            | Female     | 23         | —                                | Clinical symptoms by doctor |              |
| 53            | Male       | 31         | —                                | Clinical symptoms by doctor |              |

The result of the negative samples for IgG detection are shown in figure S5 and figure S6. Naked eye results are shown in figure S5, auxiliary judgement are shown in figure S6. The intensity of detection result for IgG are shown in table S5.

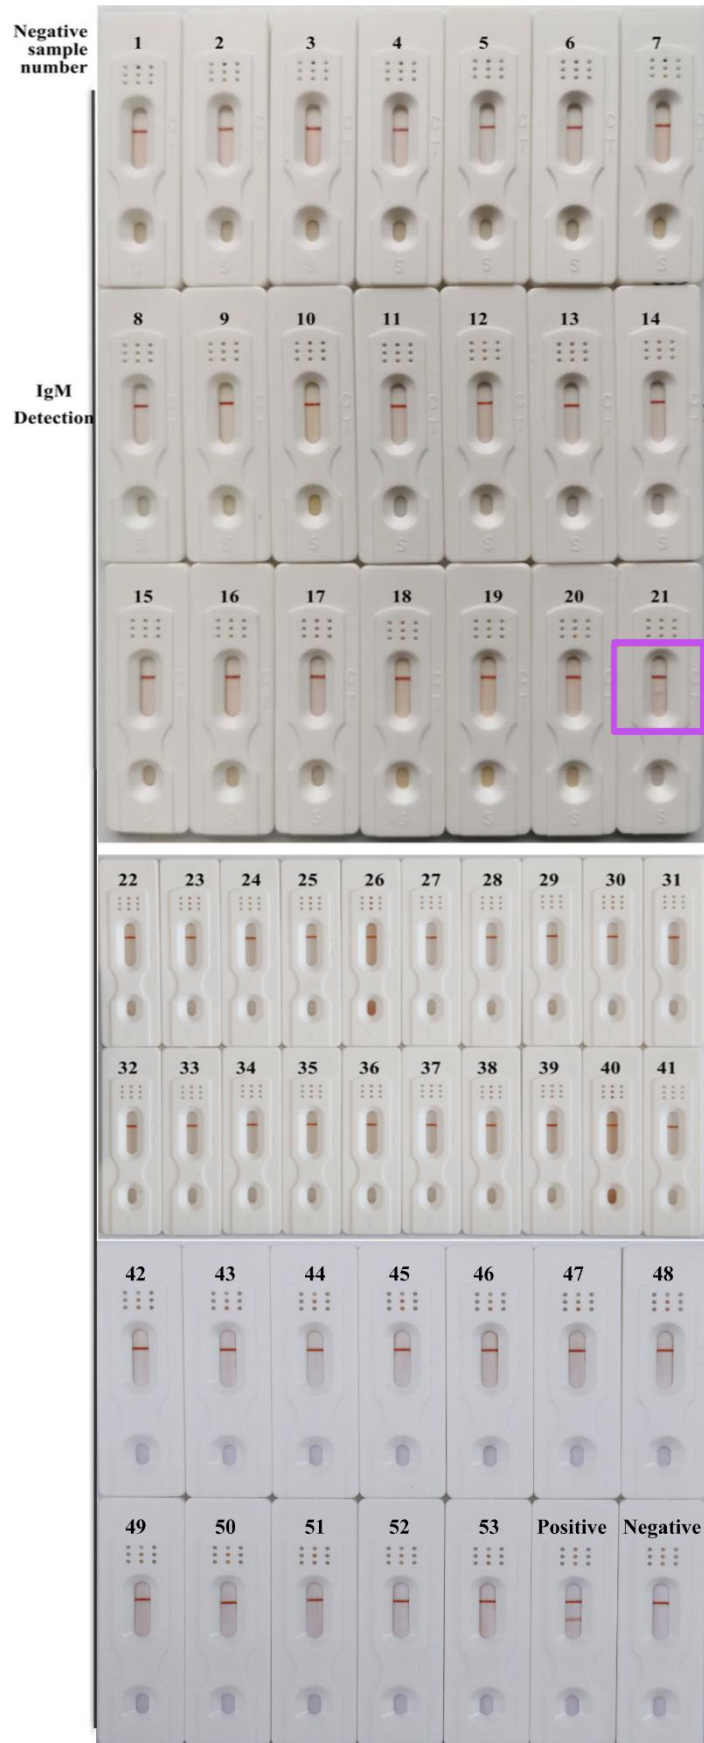

Figure S5 **IgG** detection results of all negative samples

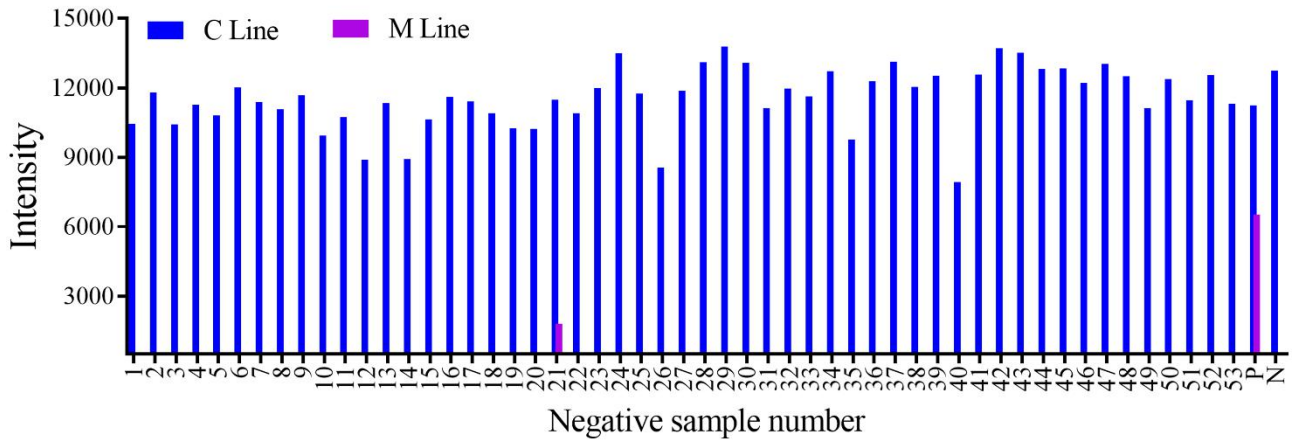

Figure S6 Auxiliary judgement of negative sample detection results of anti-SARS-CoV-2 IgG. SARS-CoV-2, severe acute respiratory syndrome coronavirus 2, C line: Control line; G line: Test line for IgG detection; P: Positive; N: Negative.



Table S5 Intensity results of negative samples for IgG detection

|               |    |    |    |          |          |    |    |    |    |    |
|---------------|----|----|----|----------|----------|----|----|----|----|----|
| Sample number | 1  | 2  | 3  | 4        | 5        | 6  | 7  | 8  | 9  | 10 |
| Color degree  | —  | —  | —  | —        | —        | ++ | —  | —  | —  | —  |
| Sample number | 11 | 12 | 13 | 14       | 15       | 16 | 17 | 18 | 19 | 20 |
| Color degree  | —  | —  | —  | —        | —        | —  | —  | —  | —  | —  |
| Sample number | 21 | 22 | 23 | 24       | 25       | 26 | 27 | 28 | 29 | 30 |
| Color degree  | —  | —  | —  | —        | —        | —  | —  | —  | —  | —  |
| Sample number | 31 | 32 | 33 | 34       | 35       | 36 | 37 | 38 | 39 | 40 |
| Color degree  | —  | —  | —  | —        | —        | —  | —  | —  | —  | —  |
| Sample number | 41 | 42 | 43 | 44       | 45       | 46 | 47 | 48 | 49 | 50 |
| Color degree  | —  | —  | —  | —        | —        | —  | —  | —  | —  | —  |
| Sample number | 51 | 52 | 53 | Positive | Negative |    |    |    |    |    |
| Color degree  | —  | —  | —  | +++      | —        |    |    |    |    |    |

The result of the negative samples for IgG detection are shown in figure S7 and figure S8. Naked eye results are shown in figure S7, auxiliary judgement are shown in figure S8. The intensity of detection result for IgG are shown in table S6.

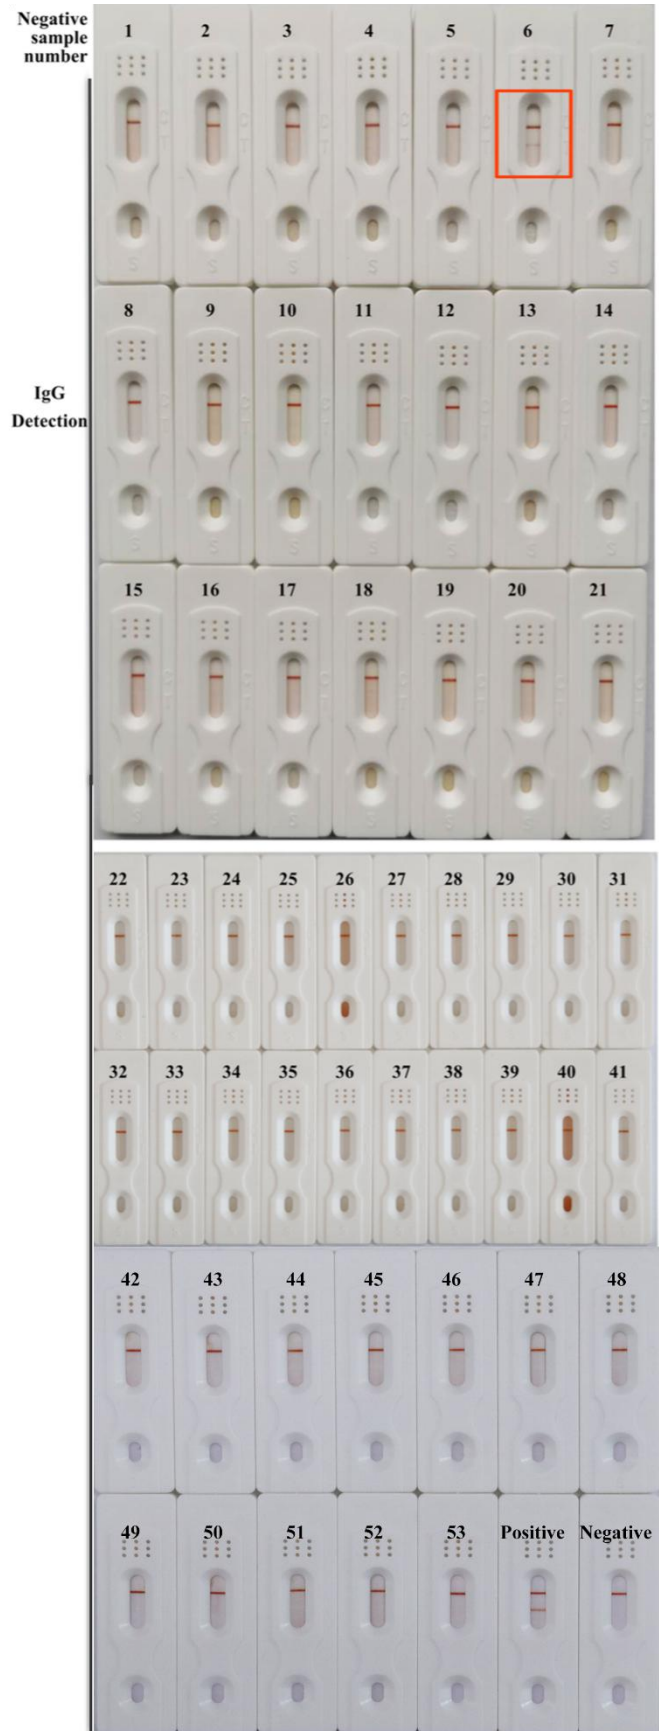

Figure S7 IgM detection results of all negative samples

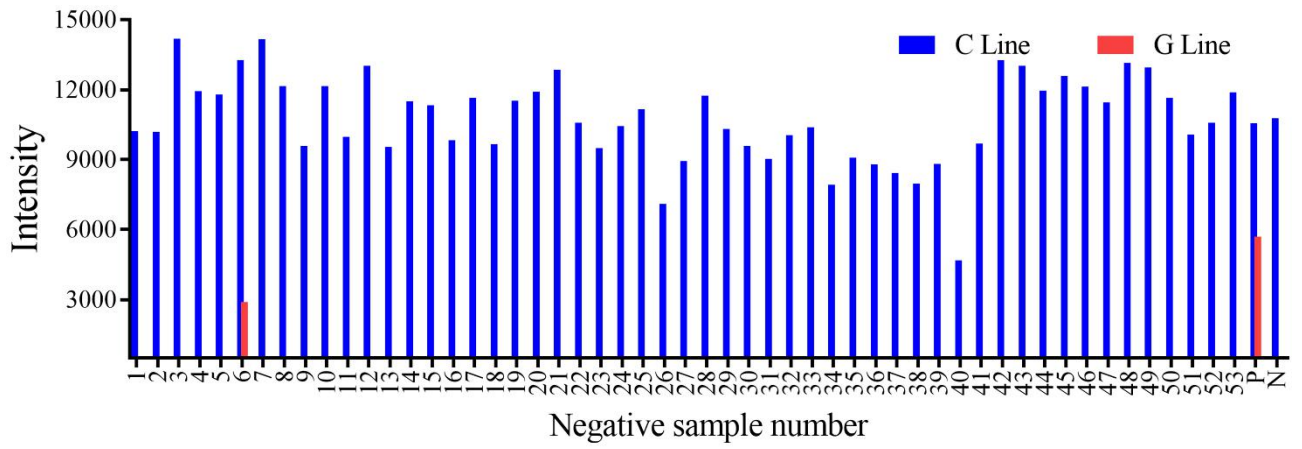

Figure S8 Auxiliary judgement of negative sample detection results of anti-SARS-CoV-2 IgM. SARS-CoV-2, severe acute respiratory syndrome coronavirus 2, C line: Control line; M line: Test line for IgM detection; P: Positive; N: Negative.

Table S6 Intensity results of negative samples for IgM detection

|               |    |    |    |          |          |    |    |    |    |    |
|---------------|----|----|----|----------|----------|----|----|----|----|----|
| Sample number | 1  | 2  | 3  | 4        | 5        | 6  | 7  | 8  | 9  | 10 |
| Color degree  | —  | —  | —  | —        | —        | —  | —  | —  | —  | —  |
| Sample number | 11 | 12 | 13 | 14       | 15       | 16 | 17 | 18 | 19 | 20 |
| Color degree  | —  | —  | —  | —        | —        | —  | —  | —  | —  | —  |
| Sample number | 21 | 22 | 23 | 24       | 25       | 26 | 27 | 28 | 29 | 30 |
| Color degree  | +  | —  | —  | —        | —        | —  | —  | —  | —  | —  |
| Sample number | 31 | 32 | 33 | 34       | 35       | 36 | 37 | 38 | 39 | 40 |
| Color degree  | —  | —  | —  | —        | —        | —  | —  | —  | —  | —  |
| Sample number | 41 | 42 | 43 | 44       | 45       | 46 | 47 | 48 | 49 | 50 |
| Color degree  | —  | —  | —  | —        | —        | —  | —  | —  | —  | —  |
| Sample number | 51 | 52 | 53 | Positive | Negative |    |    |    |    |    |
| Color degree  | —  | —  | —  | +++      | —        |    |    |    |    |    |

#### 4 Detection result for serum after the second vaccine injection by this kit

34 serum samples after second vaccination with attenuated vaccine were detected, 31 samples showed positive for IgG (Figure S9a) and/or IgM (Figure S9b) , except sample 8, 11 and 22. The response rate to the vaccine was 91.18%.

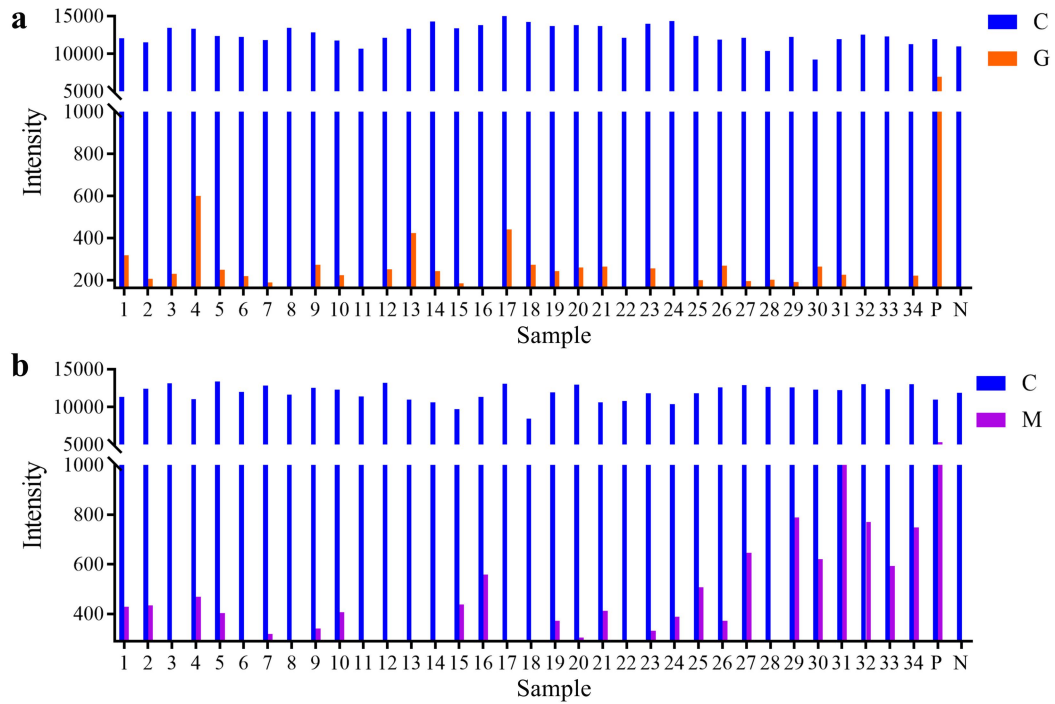

Figure S9 Detection result for serum after the second vaccination. (a) Detection result for IgG, (b) Detection result for IgM. P: positive, N: negative.
